# Supplementary material for: Groundwater–glacier meltwater interaction in proglacial aquifers
Source: Copernicus journal article supplement (doi:10.5194/hess-23-4527-2019), 2019-11-05
Supplement: Supplementary file 1 [file hess-23-4527-2019-supplement.pdf]

Supplement of Hydrol. Earth Syst. Sci., 23, 4527–4539, 2019  
<https://doi.org/10.5194/hess-23-4527-2019-supplement>  
© Author(s) 2019. This work is distributed under  
the Creative Commons Attribution 4.0 License.

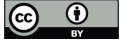

*Supplement of*

## **Groundwater–glacier meltwater interaction in proglacial aquifers**

**Brighid É. Ó Dochartaigh et al.**

*Correspondence to:* Alan M. MacDonald (amm@bgs.ac.uk)

The copyright of individual parts of the supplement might differ from the CC BY 4.0 License.

**Table S1 Summary of sandur piezometer locations, construction and test pumping data (For more information see Ó Dochartaigh et al., 2012)**

| <b>ID</b> | <b>Easting</b> | <b>Northing</b> | <b>screen depth (m)</b> | <b>Test length (min)</b> | <b>Test yield (m<sup>3</sup>d<sup>-1</sup>)</b> | <b>Maximum drawdown (m)</b> | <b>T(m<sup>2</sup>d<sup>-1</sup>)</b> | <b>Comments</b>                                     |
|-----------|----------------|-----------------|-------------------------|--------------------------|-------------------------------------------------|-----------------------------|---------------------------------------|-----------------------------------------------------|
| U1        | 63.959056      | -16.836639      | 10.9–13.9               | 300                      | 95.04                                           | 3.81                        | 100                                   |                                                     |
| U2        | 63.959417      | -16.837833      | 9.2–10.2;<br>12.2–13.2  | 225                      | 138.24                                          | 0.7                         | 600                                   |                                                     |
| M1        | 63.954194      | -16.848306      | 11.4–14.4               | 300                      | 112.32                                          | 3.46                        | 200                                   |                                                     |
| M2        | 63.955000      | -16.848583      | 12.2–14.2               | 225                      | 95.04                                           | 3.7                         | 150                                   |                                                     |
| M3        | 63.958028      | -16.850083      | 8.25–14.25              | 230                      | 120.96                                          | 0.85                        | 600                                   |                                                     |
| L1        | 63.942472      | -16.857083      | 5.5–11.5                | 360                      | 43.2                                            | 7.02                        | 80                                    | Test results affected by poor borehole construction |
| L2        | 63.943833      | -16.858222      | 4.8–7.8                 | 244                      | 157.248                                         | 0.38                        | 2500                                  |                                                     |
| L3        | 63.946694      | -16.860500      | 4.9–7.9                 | 215                      | 150.336                                         | 0.42                        | 2000                                  |                                                     |

Ó Dochartaigh, B.É., MacDonald, A.M., Wilson, P.R., Bonsor, H.: Groundwater investigations at Virkisjokull, Iceland : data report 2012. Nottingham, UK, British Geological Survey, 48pp. (OR/12/088), 2012.

**Table S2** Summary of saturated hydraulic conductivity measurements for sandur aquifer from direct infiltration tests to 0.15 m depth.

| <b>Test ID</b> | <b>Northing</b> | <b>Easting</b> | <b>Hole depth (mm)</b> | <b>Hole diameter (mm)</b> | <b>5 cm head infiltration rate (cm s<sup>-1</sup>)</b> | <b>Kfs (m d<sup>-1</sup>)</b> |
|----------------|-----------------|----------------|------------------------|---------------------------|--------------------------------------------------------|-------------------------------|
| Site 1         | 63.95299        | -16.84898      | 120                    | 65                        | 0.12                                                   | 14.83                         |
| Site 2         | 63.95345        | -16.84853      | 140                    | 70                        | 0.85                                                   | 96.62                         |
| Site 3         | 63.95390        | -16.84837      | 100                    | 60                        | 0.86                                                   | 109.4                         |
| Site 4         | 63.95451        | -16.84773      | 140                    | 65                        | 1.07                                                   | 124.4                         |
| Site 5         | 63.95491        | -16.84679      | 120                    | 60                        | 0.3                                                    | 36.58                         |
| Site 6         | 63.95500        | -16.84690      | 140                    | 60                        | 0.5                                                    | 59.62                         |
| Site 7         | 63.95700        | -16.84710      | 140                    | 50                        | 0.04                                                   | 5.47                          |
| Site 8         | 63.95511        | -16.84616      | 100                    | 120                       | 1.2                                                    | 72.86                         |
| Site 9         | 63.95634        | -16.84602      | 120                    | 60                        | 0.69                                                   | 77.47                         |
| Site 10        | 63.95759        | -16.84697      | 120                    | 50                        | 0.74                                                   | 94.46                         |
| Site 11        | 63.95760        | -16.84500      | 150                    | 100                       | 0.45                                                   | 30.96                         |
| 28/8(1)        | 63.94364        | -16.85847      | 110                    | 80                        | 0.21                                                   | 22.03                         |
| 28/8(2)        | 63.94381        | -16.85700      | 140                    | 80                        | 0.45                                                   | 47.23                         |
| 30/8(1)        | 63.94114        | -16.85653      | 150                    | 60                        | 0.08                                                   | 10.96                         |
| 30/8(2)        | 63.93800        | -16.85750      | 150                    | 100                       | 0.7                                                    | 59.20                         |
| 30/8(3)        | 63.94100        | -16.85781      | 150                    | 70                        | 0.12                                                   | 14.27                         |
| 30/8(4)        | 63.94092        | -16.85789      | 150                    | 100                       | 0.25                                                   | 21.18                         |
| 30/8(5)        | 63.94272        | -16.85789      | 150                    | 70                        | 0.42                                                   | 49.84                         |
| 7/9(1)         | 63.94261        | -16.85475      | 110                    | 60                        | 0.8                                                    | 108.7                         |
| 7/9(2)         | 63.94275        | -16.85450      | 120                    | 70                        | 1.07                                                   | 126.9                         |

**Table S3 Summary of hydraulic conductivity measurements from particle size analysis of sandur aquifer sediment samples to 0.5 m depth. Hydraulic conductivity calculated using MacDonald et al. (2012).**

| <b>Test ID</b> | <b>Northing</b> | <b>Easting</b> | <b>Hole depth<br/>(m)</b> | <b>Hole size<br/>(mm)</b> | <b>d10</b> | <b>K m/d</b> |
|----------------|-----------------|----------------|---------------------------|---------------------------|------------|--------------|
| A1.1.1         | 63.95911        | -16.83670      | 0.46                      | 1000*500                  | 0.67       | 38.25        |
| A1.1.2         | 63.95911        | -16.83675      | 0.46                      | 1000*500                  | 0.19       | 14.13        |
| A1.2.1         | 63.95914        | -16.83667      | 0.43                      | 800*500                   | 0.27       | 18.65        |
| A1.2.2         | 63.95913        | -16.83667      | 0.43                      | 800*500                   | 0.19       | 14.13        |
| A2.1.1         | 63.95936        | -16.83811      | 0.45                      | 850*500                   | 0.48       | 29.39        |
| A2.1.2         | 63.95936        | -16.83811      | 0.45                      | 850*500                   | 0.4        | 25.45        |
| A2.2.1         | 63.95936        | -16.83819      | 0.45                      | 700*400                   | 0.4        | 25.45        |
| A2.2.2         | 63.95936        | -16.83819      | 0.45                      | 700*400                   | 0.41       | 25.95        |
| B1.1.2         | 63.95614        | -16.84236      | 0.46                      | 450*560                   | 0.7        | 39.59        |
| B1.2.1         | 63.95619        | -16.84228      | 0.46                      | 1000*650                  | 1.8        | 83.50        |
| B1.2.2         | 63.95619        | -16.84228      | 0.46                      | 1000*650                  | 0.8        | 44.00        |
| B2.1.1         | 63.95761        | -16.84492      | 0.4                       | 850*500                   | 0.63       | 36.43        |
| B2.1.2         | 63.95761        | -16.84492      | 0.4                       | 850*500                   | 0.63       | 36.43        |
| B2.2.1         | 63.95761        | -16.84503      | 0.48                      | 870*660                   | 1.05       | 54.54        |
| B2.2.2         | 63.95761        | -16.84503      | 0.48                      | 870*660                   | 0.63       | 36.43        |
| B3.1.1         | 63.95867        | -16.84628      | 0.3                       | 960*500                   | 0.32       | 21.33        |
| B3.1.2         | 63.95867        | -16.84628      | 0.3                       | 960*500                   | 0.29       | 19.74        |
| C1.1           | 63.95419        | -16.84831      | 0.45                      | 600*450                   | 0.7        | 39.59        |
| C1.2           | 63.95419        | -16.84831      | 0.45                      | 600*450                   | 0.67       | 38.25        |
| C2.1           | 63.95500        | -16.84858      | 0.45                      |                           | 0.65       | 37.34        |
| C2.2           | 63.95500        | -16.84858      | 0.45                      |                           | 0.65       | 37.34        |
| C3.1           | 63.95803        | -16.85008      | 0.45                      | 500*300                   | 0.35       | 22.90        |
| D1.1           | 63.94631        | -16.85231      | 0.45                      | 700*500                   | 0.6        | 35.05        |
| D1.2           | 63.94631        | -16.85231      | 0.45                      | 700*500                   | 0.6        | 35.05        |
| D2.1           | 63.94758        | -16.85486      | 0.45                      | 750*500                   | 0.58       | 34.13        |
| D2.2           | 63.94758        | -16.85486      | 0.45                      | 750*500                   | 0.57       | 33.66        |
| D3.1           | 63.94869        | -16.85711      | 0.45                      | 700*650                   | 0.7        | 39.59        |
| D3.2           | 63.94869        | -16.85711      | 0.45                      | 700*650                   | 0.6        | 35.05        |
| E1.1           | 63.94253        | -16.85747      | 0.45                      | 770*660                   | 0.7        | 39.59        |
| E1.2           | 63.94253        | -16.85747      | 0.45                      | 770*660                   | 0.7        | 39.59        |
| E2.1           | 63.94383        | -16.85808      | 0.47                      | 600*500                   | 0.4        | 25.45        |
| E2.2           | 63.94383        | -16.85808      | 0.47                      | 600*500                   | 0.4        | 25.45        |
| E3.1           | 63.94664        | -16.86064      | 0.48                      | 670*550                   | 0.4        | 25.45        |
| E3.2           | 63.94664        | -16.86064      | 0.48                      | 670*550                   | 0.4        | 25.45        |
| F1.1           | 63.93950        | -16.86256      | 0.44                      | 640*620                   | 0.5        | 30.35        |

| <b>Test ID</b> | <b>Northing</b> | <b>Easting</b> | <b>Hole depth<br/>(m)</b> | <b>Hole size<br/>(mm)</b> | <b>d10</b> | <b>K m/d</b> |
|----------------|-----------------|----------------|---------------------------|---------------------------|------------|--------------|
| F1.2           | 63.93950        | -16.86256      | 0.44                      | 640*620                   | 0.65       | 37.34        |
| F2.1           | 63.94044        | -16.86561      | 0.52                      | 610*490                   | 0.55       | 32.73        |
| F2.2           | 63.94044        | -16.86561      | 0.52                      | 610*490                   | 0.55       | 32.73        |
| F3.1           | 63.94142        | -16.86928      | 0.43                      | 560*410                   | 0.05       | 4.92         |
| F3.2           | 63.94142        | -16.86928      | 0.43                      | 560*410                   | 0.65       | 37.34        |
| F4.1           | 63.94197        | -16.87069      | 0.4                       | 440*360                   | 0.25       | 17.55        |
| F4.2           | 63.94197        | -16.87069      | 0.4                       | 440*360                   | 0.25       | 17.55        |

MacDonald, A. M., Maurice, L., Dobbs, M. R., Reeves, H. J., and Auton, C. A.: Relating in situ hydraulic conductivity, particle size and relative density of superficial deposits in a heterogeneous catchment. *J. Hydrol.*, 434-435, 130-141, <https://doi.org/10.1016/j.jhydrol.2012.01.018>, 2012.

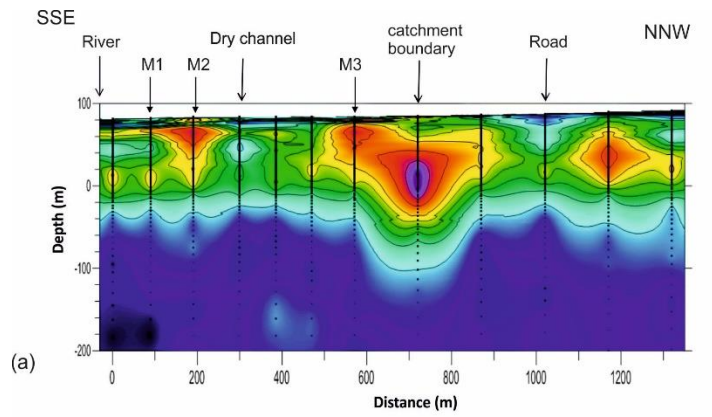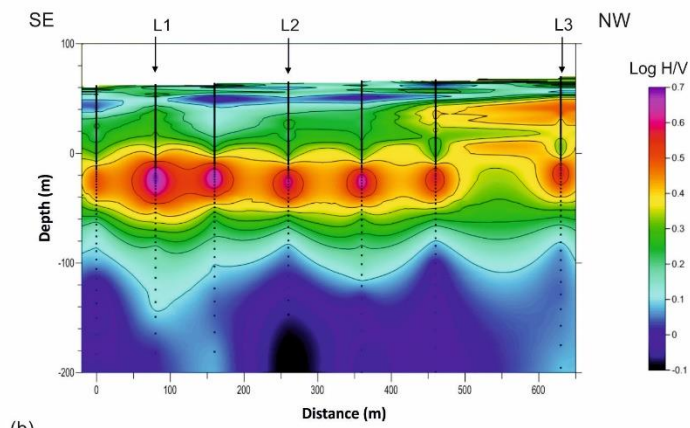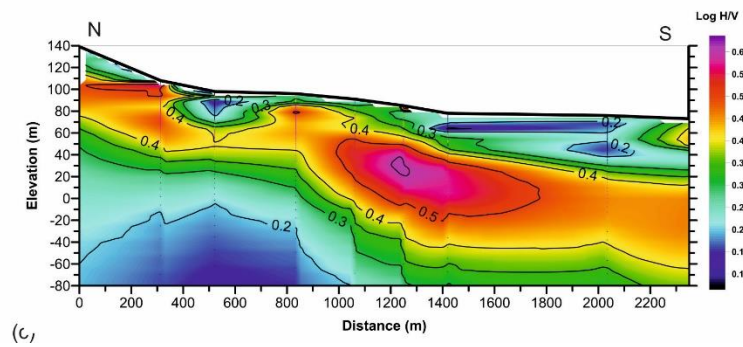

Figure S1. Log H/V from Tromino passive seismic surveys (see Methods). (a) Upper Sandur (b) Lower Sandur and (c) transect away from the glacier margin at the neighbouring sandur at Svinafellsjokul

**Table S4 Summary of selected chemical parameters, temperature and stable isotopes of river water and of groundwater in sandur aquifer in individual piezometers (piezometer locations in Fig. 1) and all springs grouped together. Data from six sampling campaigns (three summer and three winter); annual means calculated by weighting seasonal means to season length (summer = 0.42; winter = 0.58), except temperature data for piezometer groundwater: data derived from continuous monitoring in piezometers at 15 minute intervals for 34 months, at 7–8.4 m depth; annual mean unweighted. sd – standard deviation of whole dataset; n – number of samples. The full dataset is available (MacDonald et al., 2019)**

|         | SEC $\mu\text{S cm}^{-1}$ |       |    | $\text{HCO}_3 \text{ mg l}^{-1}$ |      |   | Temperature $^{\circ}\text{C}$ |      |        | $\delta^{18}\text{O}\text{‰}$ |      |    | $\delta^2\text{H}\text{‰}$ |     |                   |
|---------|---------------------------|-------|----|----------------------------------|------|---|--------------------------------|------|--------|-------------------------------|------|----|----------------------------|-----|-------------------|
|         | Mean <sup>1</sup>         | sd    | n  | Mean <sup>1</sup>                | sd   | n | Mean <sup>2</sup>              | sd   | n      | Mean <sup>1</sup>             | sd   | n  | Mean <sup>1</sup>          | sd  | Mean <sup>1</sup> |
| U1      | 62.58                     | 14.10 | 6  | 28.77                            | 6.23 | 5 | 2.35                           | 0.75 | 115274 | -10.2                         | 0.2  | 6  | -72.0                      | 2.1 | 6                 |
| U2      | 98.85                     | 10.53 | 5  | 44.42                            | 1.03 | 4 | 4.94                           | 0.10 | 115169 | -8.0                          | 0.04 | 5  | -59.1                      | 0.7 | 5                 |
| M1      | 69.59                     | 8.91  | 5  | 31.49                            | 1.71 | 4 | 5.01                           | 1.30 | 115209 | -9.4                          | 0.3  | 5  | -67.4                      | 2.6 | 5                 |
| M2      | 78.37                     | 13.04 | 5  | 36.51                            | 3.13 | 4 | 5.26                           | 1.06 | 115095 | -8.7                          | 0.4  | 5  | -63.5                      | 3.9 | 5                 |
| M3      | 78.21                     | 13.99 | 5  | 37.03                            | 4.02 | 4 | 4.69                           | 1.06 | 114905 | -8.3                          | 0.6  | 5  | -60.0                      | 4.2 | 5                 |
| L1      | 62.75                     | 6.21  | 5  | 27.33                            | 2.72 | 4 | 3.39                           | 0.98 | 114841 | -10.6                         | 0.1  | 5  | -74.2                      | 1.0 | 5                 |
| L2      | 55.39                     | 6.10  | 5  | 25.59                            | 0.3  | 4 | 3.19                           | 1.39 | 114866 | -10.7                         | 0.4  | 5  | -75.2                      | 3.4 | 5                 |
| L3      | 96.14                     | 6.98  | 5  | 47.68                            | 3.58 | 4 | 4.65                           | 0.17 | 114671 | -8.9                          | 0.2  | 5  | -63.5                      | 1.3 | 5                 |
| Springs | 68.18                     | 21.34 | 23 | 32.64                            | 7.16 | 4 | 6.05                           | 3.55 | 21     | -9.1                          | 1.0  | 23 | -64.8                      | 7.0 | 23                |
| River   | 43.00                     | 10.51 | 19 | 20.66                            | 5.43 | 9 | 1.69                           | 0.65 | 16     | -10.9                         | 0.4  | 19 | -76.1                      | 2.6 | 19                |

<sup>1</sup> Weighted annual mean

<sup>2</sup> Weighted annual mean for springs and river; unweighted for piezometers

MacDonald, A. M., Ó Dochartaigh, B. É., Fallas, H.: Water chemistry and stable isotope data, Virkisjokull Glacier Observatory, 2011-2018. British Geological Survey. (Dataset). <https://dx.doi.org/10.5285/14da9c02-c5ec-4019-8e5c-06c744d8be9d>, 2019.
